# Supplementary material for: Simulating human impacts on global water resources usingVIC-5
Source: Copernicus journal article supplement (doi:10.5194/gmd-2019-251), 2019-12-02
Supplement: Supplementary file [file gmd-2019-251-AC1-supplement.pdf]

1 Dear referee,

2

3 Thank you very much for reviewing our paper titled “Simulating human water impacts on global water  
4 resources using VIC-5” and for your valuable comments and suggestions. Below we address your  
5 comments (shown in *italic*), with our responses in blue.

6

## 7 **Model performance**

8 The referee suggests that we should “*provide more concrete information about the capability of this*  
9 *model. In particular, the simulation results should be more rigorously compared with observation, not*  
10 *simulation results of other models*”. More specifically (as stated in the specific comments), “*river*  
11 *discharge, terrestrial storage components, and reservoir components should be compared with river*  
12 *gauge, terrestrial water storage of the GRACE satellite estimation and in-situ reservoir operation*  
13 *records respectively*”. These suggestions were also raised by the other reviewer.

14 We agree with these suggestions and we will include a rigorous evaluation of the hydrological model  
15 performance. We will compare model simulations with observations and/or reported data on discharge,  
16 total water storage, reservoir storage and sectoral water demands. The following approaches are  
17 proposed:

- 18 1. Simulated discharge will be compared with monthly timeseries and multi-year average  
19 discharge from the GRDC dataset, between 1980 and 2010. Stations are selected within the  
20 major river basins of the original VIC calibration paper of Nijssen et al. (2001). Naturalized  
21 discharge as well as human-modified discharge simulations will be compared in this manner.
- 22 2. Simulated total water storage will be compared with monthly timeseries, multi-year-average  
23 total water storage and inter-annual water storage trends from the GRACE satellite dataset, for  
24 the period 2004-2016. To do so, a 300km gaussian filter will be applied to the simulated total  
25 water storage, as it is in the GRACE dataset. Total water storage will be compared for the same  
26 river basins as in the discharge comparison. Naturalized and human-modified total water storage  
27 simulations will be compared in this manner. These results will also include the unmet water  
28 demands, subsequent non-renewable groundwater abstractions and long-term total water  
29 storage exploitation.
- 30 3. Simulated sectoral water demand will be compared with monthly timeseries from the Huang et  
31 al. (2018) dataset. This is in addition to the comparison to the Shiklomanov (2000) dataset and  
32 FAOSTAT (FAO, 2016), EUROSTAT (EC, 2019) and WWDR (Connor, 2015) datasets already  
33 used in the paper. Sectoral water demands will be compared for the world and for the 5 regions

34 used in this paper (Africa, Americas, Asia, Europe and Oceania); and separately for each sector  
35 (irrigation, domestic, industrial and livestock) separately.

36 4. Simulated reservoir inflow, storage and release will be compared with monthly timeseries from  
37 Yassin et al. (2019) (assuming this data is shared), Rougé et al. (2019) and Hanasaki et al. (2006)  
38 datasets. Dams are selected based on data availability and evaluation will focus on large dams.

### 39 **Novelty**

40 The referee comments that the model *“includes too few novel aspects”*, since the reservoirs and  
41 irrigation modules were already included in previous VIC versions and the water management  
42 components were taken from several previous studies. The referee also comments that *“this paper would  
43 become better if the authors further emphasize the originality and strength”* of the study. Also, the  
44 referee feels that *“the motivation of this study is not well expressed”*.

45 In response to the issue raised by the referee, we will describe the originality and strength of the model,  
46 as well as a clear motivation for our study more clearly. We will clearly to acknowledge that the water  
47 management modules are based on previous major works, while describing clearly improvements  
48 compared to previous VIC studies, as well as other global hydrological modelling studies.

49 Compared to previous VIC studies, our model study includes the full range of water-use sectors  
50 (including domestic, industrial, energy and livestock), which have been estimated independently. Also,  
51 the routing module was fully integrated in VIC-5, which was not possible in previous VIC versions.  
52 This heavily decreases computation times for human-impact studies and provides a much improved  
53 framework for other future human-impact studies. Water-use sectors can also use groundwater as a  
54 resources, which directly impacts baseflow and thus downstream (dry-season) water availability.  
55 Compared to other studies, environmental flow requirements from surface- and groundwater systems  
56 for terrestrial freshwater ecosystems have been fully integrated. In addition, environmental flow  
57 requirements for groundwater into a hydrological model is also a novel component.

58 Concluding, we do not agree that the study includes too few novel aspects. However, we agree a clearer  
59 distinction needs to be made between aspects of model development and scientific development in this  
60 study. Therefore we will adjust our manuscript in several places.

61 Lines 84-88: “Several studies used VIC to simulate the anthropogenic impacts of irrigation and dam  
62 operation on water resources (Haddeland et al., 2006a; Haddeland et al., 2006b; Zhou et al., 2015; Zhou  
63 et al., 2016) based on the model setup of Haddeland et al. (2006b). However, water withdrawals for  
64 other sectors and flow requirements for freshwater ecosystems were ignored in these studies”

65 Will change to: “Several studies used VIC to simulate the worldwide anthropogenic impacts of irrigation  
66 and dam operation on water resources (Haddeland et al., 2006a; Haddeland et al., 2006b; Zhou et al.,  
67 2015; Zhou et al., 2016) based on the model setup of Haddeland et al. (2006b). However, groundwater

68 withdrawals, water withdrawals for other sectors and flow requirements for freshwater ecosystems were  
69 not included in these studies.”

70 Lines 89-90: “Our study aims to increase the applicability of the VIC-5 model for water resource  
71 assessments, specifically by including human impacts and environmental flow requirements.”

72 Will change to: “Our study aims to increase the applicability of the VIC model for water resource  
73 assessments, specifically by including human impacts and environmental flow requirements.”

74 Line 93: “(...) impacts on water resources. These modules include (...)”

75 Will change to: “(...) impacts on water resources. These modules will integrate the previous major works  
76 on anthropogenic-impact modelling into VIC-5. modules include (...)”

77 Line 95: “(...) systems, and dam operation.”

78 Will change to: “(...) systems, and dam operation. While the study of Haddeland et al. (2006b) already  
79 included some offline anthropogenic-impact modules (surface water use for the irrigation sector and  
80 dam operation), the new VIC-5 model structure and integrated routing are better suited for global  
81 integrated water-resource assessments and substantially decreases computation times (see Section 2.1).”

82 Line 104: “(...) imposed by EFRs.”

83 Will change to: “(...) imposed by EFRs. This EFR assessment is included to indicate the effects of the  
84 newly integrated (groundwater) environmental flow requirements on worldwide water availability. ”

85 **Specific comments**

86 *“Line 54 “Several models do not yet incorporate all aspects of anthropogenic water withdrawals...”:*  
87 *Some models include ‘most’ of them already (Döll et al., 2014; Wada et al., 2014; Hanasaki et al.,*  
88 *2018). What is the point here?”*

89 We agree with the referee that this sentence (and paragraph) may cause some confusion. Therefore we  
90 will rewrite this part of the introduction.

91 Lines 53-56: “However, further advancements are needed to improve the integration of anthropogenic  
92 impacts into hydrological models (Döll et al., 2016). Several models do not yet incorporate all aspects  
93 of anthropogenic water withdrawals such as domestic, manufacturing and energy (thermoelectric) water  
94 withdrawals from both ground and surface water.”

95 Will change to: “Further advancements are needed to improve the integration of anthropogenic impacts  
96 into hydrological models (Döll et al., 2016). The VIC model does not yet incorporate all aspects of  
97 anthropogenic water withdrawals such as domestic, manufacturing and energy (thermoelectric) water  
98 withdrawals from both ground and surface water.”

99 And will move behind line 88.

100

101 *“Line 227 “Irrigation demands”: Does this model support multiple cropping? This point is worth*  
102 *mentioning since it substantially influences irrigation water estimates in Asia, and eventually the globe”*

103 Irrigation demands support multiple cropping. This was indirectly described in section 3.1 line 299-300  
104 “MIRCA2000 distinguishes the monthly growing area(s) and season(s) of 26 irrigated and rain-fed crop  
105 types around the year 2000” and line 303-304: “Cropland coverage (the cropland area actually growing  
106 crops) varied monthly based on the crop growing areas of MIRCA2000. The remainder was treated as  
107 bare soil”. However, this will be explicitly stated.

108 Lines 234-235: “(...) applied separately (i.e. in different sub-grids).”

109 Will change to: “(...) applied separately (i.e. in different sub-grids). Note that multiple cropping seasons  
110 are included based on the MIRCA2000 land-use dataset (Portmann et al., 2010).”

111

112 *“Line 238 “who estimated the irrigation efficiency for 22 United Nations sub-regions based on*  
113 *differences between calculated irrigation requirements and reported irrigation withdrawals”:* *Taking*  
114 *at face value, any calculated requirements will perfectly match with reported withdrawals by this*  
115 *method, which sounds a bit odd. Anyway, irrigation efficiency is quite sensitive to the results and*  
116 *performance, please elaborate the background and concept.”*

117 The description of the irrigation efficiency implementation will be elaborated upon.

118 Lines 238-240: “The water loss fraction was based on Frenken and Gillet (2012), who estimated the  
119 irrigation efficiency for 22 United Nations sub-regions based on differences between calculated  
120 irrigation requirements and reported irrigation withdrawals.”

121 Will change to: “The water loss fraction was based on Frenken and Gillet (2012), who estimated the  
122 irrigation efficiency for 22 United Nations sub-regions. Irrigation efficiencies were estimated based on  
123 the differences between the calculated crop water requirements (crop evapotranspiration; consumptive  
124 water use) and the reported irrigation water withdrawals (including transportation and application  
125 losses). Crop water requirements are estimated based on the FAO Irrigation and Drainage paper (Allen  
126 et al., 1998). Low irrigation efficiencies can result in irrigation water withdrawals up to four times  
127 higher than the crop water requirements in regions such as east- and west Africa.”

128

129 *“Line 334 “while the ensemble mean potential and actual withdrawals were only 2200km<sup>3</sup> and  
130 1400km<sup>3</sup> respectively”: According to Figure 3, the potential withdrawal looks more than 2200 km<sup>3</sup>.  
131 Please revisit the number (or figure).”*

132 The number in the text should be 2460 km<sup>3</sup>.

133 Lines 333-335: “Annual potential and actual irrigation withdrawals for VIC-WUR were around 3060  
134 km<sup>3</sup> and 1870 km<sup>3</sup> respectively, while the ensemble mean potential and actual withdrawals were only  
135 2200 km<sup>3</sup> and 1400 km<sup>3</sup> respectively”

136 Will change to: “Annual potential and actual irrigation withdrawals for VIC-WUR were around 3060  
137 km<sup>3</sup> and 1870 km<sup>3</sup> respectively, while the ensemble mean potential and actual withdrawals were only  
138 2460 km<sup>3</sup> and 1400 km<sup>3</sup> respectively”

139

140 *“Figure 5: First, domestic water withdrawal of the H08 model is an apparent outlier. It would only  
141 make sense if the model reports water consumption, not water withdrawal. Anyway, this figure only tells  
142 us that all the models and estimates are different. It doesn’t provide any concrete information how well  
143 the performance of VIC-WUR is.”*

144 The data for H08 is the actual domestic water withdrawal as supplied to the ISIMIP2a project. However,  
145 to avoid confusion we will remove the model from the analysis of non-irrigation water withdrawals.

146 The figure was also meant to place the VIC-WUR model in context of the other models. Note that the  
147 Shiklomanov (2000) values are based on worldwide reported data (not modelled). However, to provide  
148 more concrete information about the performance of VIC-WUR we will compare the model results to  
149 Huang et al. (2018), in addition to Shiklomanov (2000) (as described above).

150 Line 320-321: “H08 additionally provided data for the domestic sector, and PCR-GLOBWB  
151 additionally provided data for the domestic and livestock sector.”

152 Will change to: “PCR-GLOBWB additionally provided data for the domestic and livestock sector.”

153

154 *“Line 400 “Actual irrigation withdrawals of VIC-WUR are high compared to the other Models...”: The  
155 ‘actual irrigation withdrawals’ simulated by global hydrological models are highly dependent on the  
156 model components (e.g. groundwater, small irrigation reservoir, aqueducts, etc.) and the settings (e.g.  
157 calculation interval, assignment of environmental flow, etc.). Superficial comparison of numbers is  
158 simply meaningless. If the authors wish to keep this part, intensively discuss what can (and cannot) be  
159 learned from this intercomparison.”*

160 The referee indicates that, without a proper description of the model setup, comparison between different  
161 model results is meaningless. Therefore, we will describe most of the model settings and components  
162 as well as more rigorously discuss the model differences in the results. Also, we will compare the model  
163 results to the worldwide gridded sectoral water withdrawal data of Huang et al. (2018). However, we  
164 would still like to include these results since it puts VIC-WUR in the context of the older VIC version  
165 of Haddeland et al. (2006b) and other global hydrological models.

166 The results indicate to what extent the hydrological models are able to use renewable water resources  
167 for the anthropogenic water demand (and thus to what extent there would be non-renewable water  
168 withdrawals). Also, there is no other way to compare the water resource availability on a global scale,  
169 since such observations are not available.

170 Line 317-318: “(...) and WaterGAP (Muller Schmied et al., 2016). The ISIMIP2a outputs (...)”

171 Will change to: “(...) and WaterGAP (Muller Schmied et al., 2016). For simulation round 2a the models  
172 were required to harmonize their land-use and weather-forcing inputs. Also, no non-renewable water  
173 abstractions were allowed, as not to violate the water balance. Of these models only PCR-GLOBLWB  
174 includes (renewable) groundwater withdrawals and only the VIC model did not consider paddy rice  
175 practices. The ISIMIP2a outputs (...)”

176

177 *“Line 420-434 “When adhering to EFRs the global water withdrawals are reduced substantially...”: It  
178 is hard for me to support the claim here. The Environmental Flow Requirement (EFR) is, unfortunately,  
179 seldom taken care in water scarce regions. If it was taken care, we would observe no groundwater  
180 depletion, no terminal lake shrinkage, no flow depletion at river mouth at any places in the world. In  
181 reality, we do observe such ‘tragedy’ at many places in the world (e.g. the groundwater depletion in the  
182 Central Valley in USA, the shrinkage of the Aral Sea, almost complete depletion at the river mouth of*

183 *the Colorado River). I feel that EFR brings only uncertainties in the phase of model validation, hence*  
184 *better to put aside in a model description paper.”*

185 We did not try to imply that Environmental Flow Requirements (EFRs) are seldom taken care of, rather  
186 that the opposite is true. However, since the integrated surface and groundwater EFRs are some of the  
187 additions to the hydrological model, we think it wise to discuss some of the impacts of this addition and  
188 its implications. However, the discussion will be shortened.

189 Line 351-352: “Therefore, the impact of the environmental flow requirements was largest in  
190 groundwater dependent regions”

191 Will change to: “Therefore, the potential impact of the environmental flow requirements (if adhered to)  
192 would be largest in groundwater dependent regions”

193 Line 420-421: “When adhering to EFRs the global water withdrawals are reduced substantially,  
194 especially due to groundwater withdrawal limitations”

195 Will change to: “If water-users would adhere to EFRs the global water withdrawals reduce substantially,  
196 especially due to constrains in groundwater withdrawals”

197 Lines 421-425: “This limitation indicates competition between water allocated for anthropogenic uses  
198 and environmental purposes. In addition, groundwater withdrawal reductions upstream lead to increased  
199 surface water availability downstream. This interaction results in a trade-off between upstream  
200 groundwater withdrawals and downstream surface water withdrawals.”

201 Will be removed

202

203 *“Line 436-448 “However, there are some challenges when applying the methods as described in our*  
204 *paper to future water-food-energy nexus assessments”: I am not totally sure whether this paragraph is*  
205 *necessary in this paper. Indeed, the nexus has been extensively studied in the last decade, and some*  
206 *studies have already addressed some of the questions the authors raised. For instance, the community*  
207 *of integrated assessment models have studied on water scarcity on energy generation and*  
208 *manufacturing (Hejazi et al. 2014; Fujimori et al., 2017; Bijl et al. 2018).”*

209 We agree with the reasoning of the referee. This section takes up too much space in the discussion  
210 section and we will therefore remove this paragraph.

211

212 We hope the referee agrees with our changes made, and are open to any further suggestions or comments.

213 Sincerely,

214 Bram Droppers on behalf of all co-authors

216 **References**

- 217 Allen, R. G., Pereira, L. S., Raes, D., and Smith, M.: Crop Evapotranspiration - Guidelines for  
218 computing crop water requirements, Food and Agricultural Organisation, Rome, Italy, 326, 1998.
- 219 Connor, R.: Water for a sustainable world, United Nations Educational, Scientific and Cultural  
220 Organisation, Paris, France, 139, 2015.
- 221 Döll, P., Douville, H., Guntner, A., Muller Schmied, H., and Wada, Y.: Modelling Freshwater Resources  
222 at the Global Scale: Challenges and Prospects, *Surv Geophys*, 37, 195-221, 10.1007/s10712-015-9343-  
223 1, 2016.
- 224 Frenken, K., and Gillet, V.: Irrigation water requirement and water withdrawal by country, Food and  
225 agricultural organisation, Rome, Italy, 264, 2012.
- 226 Haddeland, I., Lettenmaier, D. P., and Skaugen, T.: Effects of irrigation on the water and energy balances  
227 of the Colorado and Mekong river basins, *J Hydrol*, 324, 210-223, 10.1016/j.jhydrol.2005.09.028,  
228 2006a.
- 229 Haddeland, I., Skaugen, T., and Lettenmaier, D. P.: Anthropogenic impacts on continental surface water  
230 fluxes, *Geophys Res Lett*, 33, 10.1029/2006gl026047, 2006b.
- 231 Hanasaki, N., Kanae, S., and Oki, T.: A reservoir operation scheme for global river routing models, *J*  
232 *Hydrol*, 327, 22-41, 10.1016/j.jhydrol.2005.11.011, 2006.
- 233 Huang, Z., Hejazi, M., Li, X., Tang, Q., Vernon, C., Leng, G., Liu, Y., Döll, P., Eisner, S., Gerten, D.,  
234 Hanasaki, N., and Wada, Y.: Reconstruction of global gridded monthly sectoral water withdrawals for  
235 1971–2010 and analysis of their spatiotemporal patterns, *Hydrol. Earth Syst. Sci.*, 22, 2117-2133,  
236 10.5194/hess-22-2117-2018, 2018.
- 237 Muller Schmied, H., Adam, L., Eisner, S., Fink, G., Flörke, M., Kim, H., Oki, T., Portmann, F. T.,  
238 Reinecke, R., Riedel, C., Song, Q., Zhang, J., and Döll, P.: Variations of global and continental water  
239 balance components as impacted by climate forcing uncertainty and human water use, *Hydrol Earth Syst*  
240 *Sc*, 20, 2877-2898, 10.5194/hess-20-2877-2016, 2016.
- 241 Nijssen, B., O'Donnell, G. M., Lettenmaier, D. P., Lohmann, D., and Wood, E. F.: Predicting the  
242 discharge of global rivers, *J Climate*, 14, 3307-3323, Doi 10.1175/1520-  
243 0442(2001)014<3307:Ptdogr>2.0.Co;2, 2001.
- 244 Portmann, F. T., Siebert, S., and Döll, P.: MIRCA2000-Global monthly irrigated and rainfed crop areas  
245 around the year 2000: A new high-resolution data set for agricultural and hydrological modeling, *Global*  
246 *Biogeochem Cy*, 24, 10.1029/2008gb003435, 2010.
- 247 Rougé, C., Reed, P. M., Grogan, D. S., Zuidema, S., Prusevich, A., Glidden, S., Lamontagne, J. R., and  
248 Lammers, R. B.: Coordination and Control: Limits in Standard Representations of Multi-Reservoir  
249 Operations in Hydrological Modeling, *Hydrol. Earth Syst. Sci. Discuss.*, 2019, 1-37, 10.5194/hess-  
250 2019-589, 2019.
- 251 Shiklomanov, I. A.: Appraisal and assessment of world water resources, *Water Int*, 25, 11-32, Doi  
252 10.1080/02508060008686794, 2000.
- 253 Yassin, F., Razavi, S., Elshamy, M., Davison, B., Sapriza-Azuri, G., and Wheeler, H.: Representation  
254 and improved parameterization of reservoir operation in hydrological and land-surface models, *Hydrol.*  
255 *Earth Syst. Sci.*, 23, 3735-3764, 10.5194/hess-23-3735-2019, 2019.
- 256 Zhou, T., Haddeland, I., Nijssen, B., and Lettenmaier, D. P.: Human induced changes in the global water  
257 cycle, *AGU Geophysical Monograph Series*, Submitted, 2015.
- 258 Zhou, T., Nijssen, B., Gao, H. L., and Lettenmaier, D. P.: The Contribution of Reservoirs to Global  
259 Land Surface Water Storage Variations, *J Hydrometeorol*, 17, 309-325, 10.1175/Jhm-D-15-0002.1,  
260 2016.
